# Supplementary material
Source: MDPI journal article supplement (https://www.mdpi.com/2308-3417/9/1/7)

**Supplemental Table S1.** ICD 10 codes

| Disease/Procedure                      | ICD-10 Codes                                                                                                                                                                                                                                                                                                                                                                                                                                                                                                                                                                           |
|----------------------------------------|----------------------------------------------------------------------------------------------------------------------------------------------------------------------------------------------------------------------------------------------------------------------------------------------------------------------------------------------------------------------------------------------------------------------------------------------------------------------------------------------------------------------------------------------------------------------------------------|
| Covid 19                               | U071                                                                                                                                                                                                                                                                                                                                                                                                                                                                                                                                                                                   |
| Dementia                               | F0150,F0151,F0280,F0281,F0390,F0391,<br>G3183,G300,G301,G308,G309,G3101,G3109                                                                                                                                                                                                                                                                                                                                                                                                                                                                                                          |
| Drug induced dementia<br>(excluded)    | F1027,F1097,F1327,F1397,F1817,F1827,F1897,F1917,F1927,F1997                                                                                                                                                                                                                                                                                                                                                                                                                                                                                                                            |
| Vasopressor use                        | 3E030XZ,3E033XZ,3E040XZ,3E043XZ,3E050XZ,3E053XZ,3E060XZ,3E063XZ                                                                                                                                                                                                                                                                                                                                                                                                                                                                                                                        |
| Mechanical ventilation<br>invasive     | 0BH17EZ,0BH18EZ,5A1935Z,5A0945Z,5A0955Z                                                                                                                                                                                                                                                                                                                                                                                                                                                                                                                                                |
| Non-invasive mechanical<br>ventilation | 5A09457,5A09458,5A09358,5A09557,5A09558,5A09357                                                                                                                                                                                                                                                                                                                                                                                                                                                                                                                                        |
| Sudden cardiac arrest                  | I462,I468,I469                                                                                                                                                                                                                                                                                                                                                                                                                                                                                                                                                                         |
| Hemodialysis                           | 5A1D70Z,5A1D90Z,5A1D80Z,5A1D00Z,5A1D60Z                                                                                                                                                                                                                                                                                                                                                                                                                                                                                                                                                |
| CKD                                    | N181,N182,N1830,N1831,N1832,N184,N185,N189                                                                                                                                                                                                                                                                                                                                                                                                                                                                                                                                             |
| AKI                                    | N170,N171,N172,N178,N179,N990                                                                                                                                                                                                                                                                                                                                                                                                                                                                                                                                                          |
| Acute liver failure                    | K7200,K7201,K712                                                                                                                                                                                                                                                                                                                                                                                                                                                                                                                                                                       |
| VTE                                    | I82210,I82220,I82290,I82401,I82402,I82403,I82409,I82411,<br>I82412,I82413,I82419,I82421,I82422,I82423,I82429,I82431,I82432,<br>I82433,I82439,I82441,I82442,I82443,I82449,I82451,I82452,<br>I82453,I82459,I82461,I82462,I82463,I82469,I82491,I82492,I82493,<br>I82499,I824Y1,I824Y2,I824Y3,I824Y9,I824Z1,I824Z2,I824Z3,I824Z9,<br>I82601,I82602,I82603,I82609,I82611,I82612,I82613,I82619,I82621,<br>I82622,I82623,I82629,I82890,I8290,I82A11,I82A12,I82A13,I82A19,<br>I82B11,I82B12,I82B13,I82B19,I82C11,I82C12,I82C13,I82C19,I260,<br>I2601,I2602,I2690,I2692,I2693,I2694,I2699,I2609 |
| Smoking                                | F17,F172,F1720,F17200,F17201,F17203,F17208,<br>F17209,F1721,F17210,F17211,F17213,F17218,<br>F17219,F1722,F17220,F17221,F17223,F17228,<br>F17229,F1729,F17290,F17291,F17293,F17298,F17299,Z87891                                                                                                                                                                                                                                                                                                                                                                                        |
| Tracheostomy                           | 0B110F4,0B110Z4,0B113F4,0B113Z4,0B114F4,0B114Z4                                                                                                                                                                                                                                                                                                                                                                                                                                                                                                                                        |
| AMI                                    | I2101,I2102,I2109,I2111,I2119,I2121,<br>I2129,I213,I220,I221,I228,I229,I214,I222                                                                                                                                                                                                                                                                                                                                                                                                                                                                                                       |
| CAD                                    | I2510,I25111,I25118,I25119,I252,I253,I254,<br>I2541,I2542,I255,I256,I257,I2570,I25700,<br>I25701,I25708,I25709,I2571,I25710,I25711,I25718,<br>I25719,I2572,I25720,I25721,I25728,I25729,I2573,I25730,<br>I25731,I25738,I25739,I2575,I25750,I25751,I25758,I25759,                                                                                                                                                                                                                                                                                                                        |

|                                          |                                                                                                                                                                                                                                                                                                                                                                                                                                                                                                                                                                                                                                                                                                                                                                                                                                                     |
|------------------------------------------|-----------------------------------------------------------------------------------------------------------------------------------------------------------------------------------------------------------------------------------------------------------------------------------------------------------------------------------------------------------------------------------------------------------------------------------------------------------------------------------------------------------------------------------------------------------------------------------------------------------------------------------------------------------------------------------------------------------------------------------------------------------------------------------------------------------------------------------------------------|
|                                          | I2576,I25760,I25761,I25768,I25769                                                                                                                                                                                                                                                                                                                                                                                                                                                                                                                                                                                                                                                                                                                                                                                                                   |
| Chronic Pulmonary Disease                | Elixhauser comorbidities index                                                                                                                                                                                                                                                                                                                                                                                                                                                                                                                                                                                                                                                                                                                                                                                                                      |
| Diabetes (2 types)                       | Elixhauser comorbidities index                                                                                                                                                                                                                                                                                                                                                                                                                                                                                                                                                                                                                                                                                                                                                                                                                      |
| AIDS                                     | Elixhauser comorbidities index                                                                                                                                                                                                                                                                                                                                                                                                                                                                                                                                                                                                                                                                                                                                                                                                                      |
| Hypothyroidism                           | Elixhauser comorbidities index                                                                                                                                                                                                                                                                                                                                                                                                                                                                                                                                                                                                                                                                                                                                                                                                                      |
| Autoimmune                               | Elixhauser comorbidities index                                                                                                                                                                                                                                                                                                                                                                                                                                                                                                                                                                                                                                                                                                                                                                                                                      |
| Dementia                                 | Elixhauser comorbidities index                                                                                                                                                                                                                                                                                                                                                                                                                                                                                                                                                                                                                                                                                                                                                                                                                      |
| Depression                               | Elixhauser comorbidities index                                                                                                                                                                                                                                                                                                                                                                                                                                                                                                                                                                                                                                                                                                                                                                                                                      |
| Lymphoma                                 | Elixhauser comorbidities index                                                                                                                                                                                                                                                                                                                                                                                                                                                                                                                                                                                                                                                                                                                                                                                                                      |
| Leukemia                                 | Elixhauser comorbidities index                                                                                                                                                                                                                                                                                                                                                                                                                                                                                                                                                                                                                                                                                                                                                                                                                      |
| Metastatic Cancer                        | Elixhauser comorbidities index                                                                                                                                                                                                                                                                                                                                                                                                                                                                                                                                                                                                                                                                                                                                                                                                                      |
| Solid Tumor Without Metastasis (2 types) | Elixhauser comorbidities index                                                                                                                                                                                                                                                                                                                                                                                                                                                                                                                                                                                                                                                                                                                                                                                                                      |
| Obesity                                  | Elixhauser comorbidities index                                                                                                                                                                                                                                                                                                                                                                                                                                                                                                                                                                                                                                                                                                                                                                                                                      |
| Drug Abuse                               | Elixhauser comorbidities index                                                                                                                                                                                                                                                                                                                                                                                                                                                                                                                                                                                                                                                                                                                                                                                                                      |
| Hypertension (2 types)                   | Elixhauser comorbidities index                                                                                                                                                                                                                                                                                                                                                                                                                                                                                                                                                                                                                                                                                                                                                                                                                      |
| PAD Peripheral vascular disease          | Elixhauser comorbidities index                                                                                                                                                                                                                                                                                                                                                                                                                                                                                                                                                                                                                                                                                                                                                                                                                      |
| Alcohol                                  | Elixhauser comorbidities index                                                                                                                                                                                                                                                                                                                                                                                                                                                                                                                                                                                                                                                                                                                                                                                                                      |
| Cerebrovascular accident                 | I6000,I6001,I6002,I6010,I6011,I6012,I602,I6020,I6021,I6022,I6030,I6031,I6032,I604,I6050,I6051,I6052,I606,I607,I608,I609,I610,I611,I612,I613,I614,I615,I616,I618,I619,I6200,I6201,I6202,I6203,I621,I629,I6300,I63011,I63012,I63013,I63019,I6302,I63031,I63032,I63033,I63039,I6309,I6310,I63111,I63112,I63113,I63119,I6312,I63131,I63132,I63133,I63139,I6319,I6320,I63211,I63212,I63213,I63219,I6322,I63231,I63232,I63233,I63239,I6329,I6330,I63311,I63312,I63313,I63319,I63321,I63322,I63323,I63329,I63331,I63332,I63333,I63339,I63341,I63342,I63343,I63349,I6339,I6340,I63411,I63412,I63413,I63419,I63421,I63422,I63423,I63429,I63431,I63432,I63433,I63439,I63441,I63442,I63443,I63449,I6349,I6350,I63511,I63512,I63513,I63519,I63521,I63522,I63523,I63529,I63531,I63532,I63533,I63539,I63541,I63542,I63543,I63549,I6359,I636,I638,I6381,I6389,I639 |

**Table S2.** Baseline demographics after propensity score matching.

| Characteristics                    | Covid & Dementia- |       | Covid & Dementia+ |       | P value |
|------------------------------------|-------------------|-------|-------------------|-------|---------|
|                                    | N                 | %     | N                 | %     |         |
| N = 361,690                        | 180845            | 50,00 | 180845            | 50,00 | --      |
|                                    |                   |       |                   |       |         |
|                                    |                   |       |                   |       |         |
| <b>Gender (%)</b>                  | N                 | %     | N                 | %     | <0.001  |
| Female                             | 97415             | 53,87 | 100555            | 55,6  |         |
| Male                               | 83430             | 46,13 | 80290             | 44,4  |         |
|                                    |                   |       |                   |       |         |
| <b>Mean Age Years (SD)</b>         | Mean              | SD    | Mean              | SD    |         |
| Female                             | 82,48             | 6,76  | 82,84             | 6,73  |         |
| Male                               | 81,44             | 7,09  | 81,08             | 7,08  |         |
|                                    |                   |       |                   |       |         |
| <b>AGE Groups (%)</b>              | N                 | %     | N                 | %     | 0,002   |
| 65-69                              | 10635             | 5,88  | 10645             | 5,89  |         |
| 70-74                              | 20530             | 11,35 | 19820             | 10,96 |         |
| 75-79                              | 30945             | 17,11 | 31240             | 17,27 |         |
| >=80                               | 118735            | 65,66 | 119140            | 65,88 |         |
|                                    |                   |       |                   |       |         |
| <b>RACE (%)</b>                    | N                 | %     | N                 | %     | <0.001  |
| Asian or Pacific Islander          | 4800              | 2,65  | 5295              | 2,93  |         |
| Black                              | 28870             | 15,96 | 30195             | 16,7  |         |
| Hispanic                           | 19540             | 10,8  | 20920             | 11,57 |         |
| Native American                    | 590               | 0,33  | 665               | 0,37  |         |
| Other                              | 5580              | 3,09  | 5690              | 3,15  |         |
| White                              | 121465            | 67,17 | 118080            | 65,29 |         |
| <b>MEDIAN HOUSEHOLD INCOME (%)</b> | N                 | %     | N                 | %     | <0.001  |
| <=49,999                           | 55975             | 30,95 | 55130             | 30,48 |         |
| 50K-64,999                         | 47740             | 26,4  | 46710             | 25,83 |         |
| 65K-85,999                         | 40645             | 22,48 | 40745             | 22,53 |         |
| >=86k                              | 36485             | 20,17 | 38260             | 21,16 |         |

|                                     |          |          |          |          |                  |
|-------------------------------------|----------|----------|----------|----------|------------------|
|                                     |          |          |          |          |                  |
| <b>INSURANCE STATUS (%)</b>         | <b>N</b> | <b>%</b> | <b>N</b> | <b>%</b> | <b>&lt;0.001</b> |
| Medicaid                            | 3635     | 2,01     | 3970     | 2,2      |                  |
| Medicare                            | 163590   | 90,46    | 161940   | 89,55    |                  |
| No charge                           | 130      | 0,07     | 150      | 0,08     |                  |
| Other                               | 3965     | 2,19     | 4030     | 2,23     |                  |
| Private Insurance                   | 8875     | 4,91     | 9860     | 5,45     |                  |
| Self-pay                            | 650      | 0,36     | 895      | 0,49     |                  |
|                                     |          |          |          |          |                  |
| <b>HOSPITAL DIVISION (%)</b>        | <b>N</b> | <b>%</b> | <b>N</b> | <b>%</b> | <b>&lt;0.001</b> |
| East North Central                  | 39795    | 22,01    | 30240    | 16,72    |                  |
| East South Central                  | 8195     | 4,53     | 12530    | 6,93     |                  |
| Middle Atlantic                     | 45520    | 25,17    | 28225    | 15,61    |                  |
| Mountain                            | 6290     | 3,48     | 7420     | 4,1      |                  |
| New England                         | 14055    | 7,77     | 9575     | 5,29     |                  |
| Pacific                             | 10645    | 5,89     | 19790    | 10,94    |                  |
| South Atlantic                      | 28495    | 15,76    | 40210    | 22,23    |                  |
| West North Central                  | 13410    | 7,42     | 10450    | 5,78     |                  |
| West South Central                  | 14440    | 7,98     | 22405    | 12,39    |                  |
|                                     |          |          |          |          |                  |
| <b>HOSPITAL BEDSIZE (%)</b>         | <b>N</b> | <b>%</b> | <b>N</b> | <b>%</b> | <b>&lt;0.001</b> |
| Large                               | 78280    | 43,29    | 78770    | 43,56    |                  |
| Medium                              | 52550    | 29,06    | 56265    | 31,11    |                  |
| Small                               | 50015    | 27,66    | 45810    | 25,33    |                  |
|                                     |          |          |          |          |                  |
| <b>HOSPITAL TEACHING STATUS (%)</b> | <b>N</b> | <b>%</b> | <b>N</b> | <b>%</b> | <b>&lt;0.001</b> |
| Rural                               | 22085    | 12,21    | 17730    | 9,8      |                  |
| Urban nonteaching                   | 31580    | 17,46    | 36115    | 19,97    |                  |
| Urban teaching                      | 127180   | 70,33    | 127000   | 70,23    |                  |
|                                     |          |          |          |          |                  |
| <b>COMORBIDITIES (%)</b>            | <b>N</b> | <b>%</b> | <b>N</b> | <b>%</b> |                  |
| CAD                                 | 53965    | 29,84    | 48970    | 27,08    | 0,392            |
| MI                                  | 12160    | 6,72     | 9425     | 5,21     | <0.001           |
| HTN                                 | 145005   | 80,18    | 144645   | 79,98    | 0,133            |
| Diabetes (2)                        | 70860    | 39,18    | 69910    | 38,66    | 0,001            |

|                             |       |       |       |       |        |
|-----------------------------|-------|-------|-------|-------|--------|
| Cancer (5)                  | 6380  | 3,53  | 6805  | 3,76  | <0.001 |
| Obesity                     | 14695 | 8,13  | 15165 | 8,39  | 0,004  |
| Drug Abuse                  | 530   | 0,29  | 795   | 0,44  | <0.001 |
| Smoking                     | 52425 | 28,99 | 41325 | 22,85 | <0.001 |
| Alcohol                     | 1610  | 0,89  | 1815  | 1     | <0.001 |
| Chronic Pulmonary Disease   | 41105 | 22,73 | 40125 | 22,19 | <0.001 |
| Peripheral Vascular Disease | 11510 | 6,36  | 12125 | 6,7   | <0.001 |
| CKD                         | 41235 | 22,8  | 37260 | 20,6  | <0.001 |
| Hypothyroidism              | 36435 | 20,15 | 36955 | 20,43 | <0.001 |
| Autoimmune                  | 4410  | 2,44  | 4805  | 2,66  | <0.001 |
| Depression                  | 28175 | 15,58 | 32900 | 18,19 | <0.001 |
| AIDS                        | 225   | 0,12  | 295   | 0,16  | 0,002  |

**Supplemental Figure S1. Mortality Predictors in COVID-19 and Dementia + Patients**

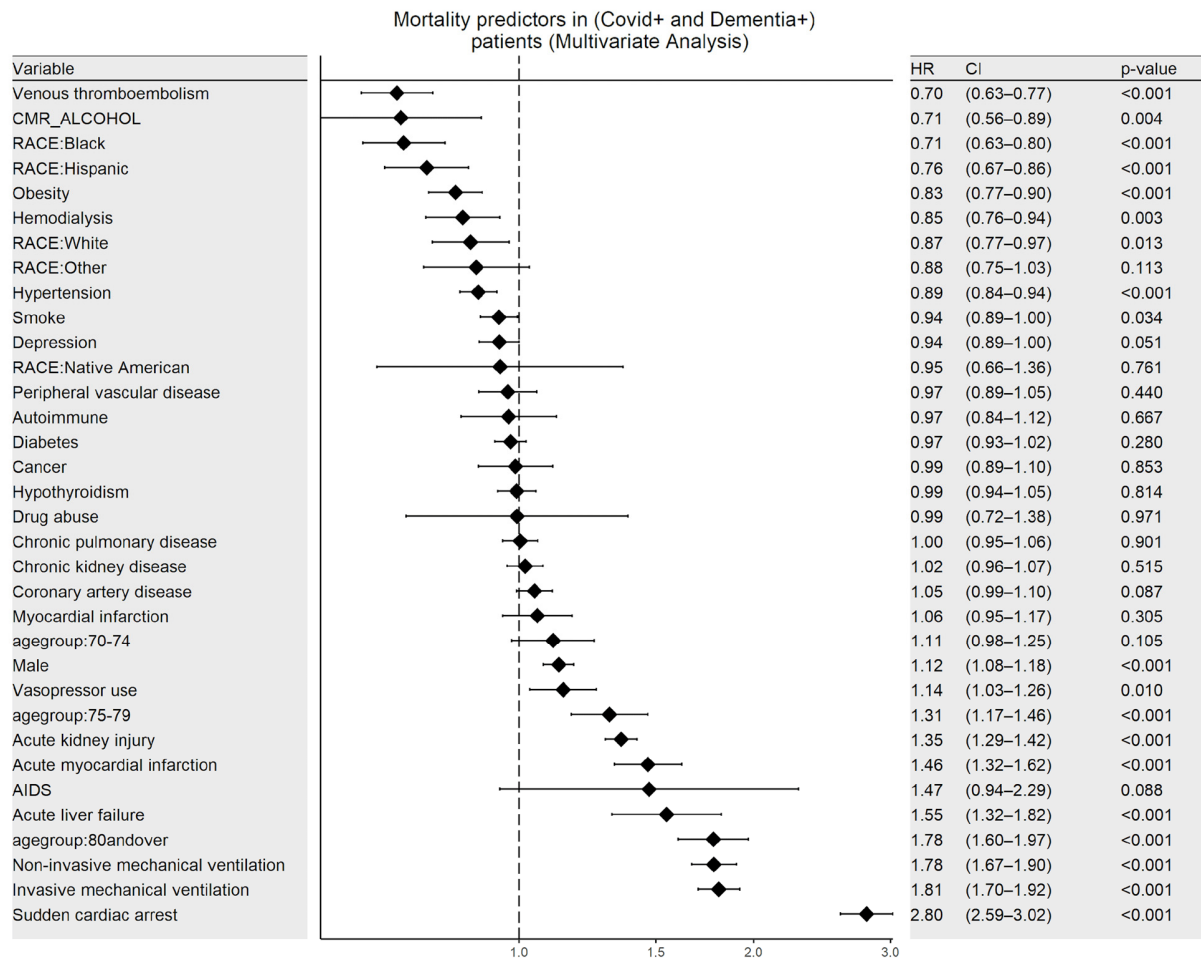

Supplement: s1 [file s1]
